# Supplementary material for: Multiple site occupancy induced yellow-orange emission in an Eu2+-doped KSr6Sc(SiO4)4 phosphor towards optical temperature sensors
Source: Royal Society of Chemistry journal article supplement (doi:10.1039/d3dt00163f), 2023-01-01
Supplement: d3dt00163f1.pdf [file d3dt00163f1.pdf]

## **Multiple sites occupancy induced yellow-orange emission in Eu<sup>2+</sup>-doped KSr<sub>6</sub>Sc(SiO<sub>4</sub>)<sub>4</sub> phosphor towards optical temperature sensors**

Wenjing Wang,<sup>a,b,c</sup> Tao Tan,<sup>a</sup> Shangwei Wang,<sup>a,b</sup> Taixing Tan,<sup>b</sup> Su Zhang,<sup>a,\*</sup> Chengyu Li,<sup>a</sup> Hongjie Zhang<sup>a</sup>

\* Corresponding authors.

*E-mail addresses:* Su Zhang (zhangsu@ciac.ac.cn )

<sup>a</sup> *State Key Laboratory of Rare Earth Resource Utilization, Changchun Institute of Applied Chemistry, Chinese Academy of Sciences, Changchun 130022, P. R. China*

<sup>b</sup> *Ganjiang Innovation Academy, Chinese Academy of Sciences, Ganzhou 341000, P. R. China*

<sup>c</sup> *School of Rare Earths, University of Science and Technology of China, Hefei, Anhui 230026, P. R. China.*

**Tables:****Table S1.** The atom positions, fraction factors, and occupancy of KSSSO: $x\text{Eu}^{2+}$  ( $x=0$ ,  $x=0.07$ ,  $x=0.11$ ,  $0.13$ ) samples.

| Formula |      | KSr <sub>6</sub> Sc(SiO <sub>4</sub> ) <sub>4</sub> |             |            |           |
|---------|------|-----------------------------------------------------|-------------|------------|-----------|
| Atom    | Wyck | x                                                   | y           | z          | Occupancy |
| Sr1     | 8d   | 0.40961(14)                                         | 0.0031(4)   | 0.3322(5)  | 0.95      |
| K1      | 8d   | 0.40961(14)                                         | 0.0031(4)   | 0.3322(5)  | 0.05      |
| Sr2     | 8d   | 0.22463(15)                                         | 0.01748(28) | 0.4887(4)  | 1         |
| Sr3     | 4c   | 0.48331(22)                                         | -0.25       | -0.0012(8) | 1         |
| Sr4     | 4c   | 0.3375(4)                                           | 0.25        | 0.7208(8)  | 0.7       |
| K2      | 4c   | 0.3375(4)                                           | 0.25        | 0.7208(8)  | 0.3       |
| K3      | 4c   | 0.31976(33)                                         | -0.25       | 0.6529(10) | 0.6       |
| Sr5     | 4c   | 0.31976(33)                                         | -0.25       | 0.6529(10) | 0.4       |
| Sc      | 4c   | 0.4937(5)                                           | -0.25       | 0.4656(14) | 1         |
| Si1     | 4c   | 0.3300(7)                                           | -0.25       | 0.2248(20) | 1         |
| Si2     | 4c   | 0.3586(9)                                           | 0.25        | 0.2385(21) | 1         |
| Si3     | 8d   | 0.4218(5)                                           | 0.0013(13)  | 0.7839(12) | 1         |
| O1      | 4c   | 0.3269(15)                                          | -0.25       | 0.007(4)   | 1         |
| O2      | 8d   | 0.2834(12)                                          | -0.3545(20) | 0.352(4)   | 1         |
| O3      | 4c   | 0.3513(25)                                          | -0.25       | 0.204(8)   | 1         |
| O4      | 4c   | 0.3825(13)                                          | 0.25        | -0.037(4)  | 1         |
| O5      | 8d   | 0.2945(11)                                          | 0.3596(19)  | 0.2620(23) | 1         |
| O6      | 4c   | 0.4033(12)                                          | 0.25        | 0.373(4)   | 1         |
| O7      | 8d   | 0.4203(8)                                           | -0.0386(16) | 0.9931(28) | 1         |
| O8      | 8d   | 0.3412(8)                                           | -0.0035(24) | 0.7055(21) | 1         |
| O9      | 8d   | 0.4584(10)                                          | 0.1394(16)  | 0.6785(29) | 1         |
| O10     | 8d   | 0.4597(11)                                          | -0.0995(18) | 0.6930(29) | 1         |

| Formula |      | KSr <sub>5.93</sub> Sc(SiO <sub>4</sub> ) <sub>4</sub> :0.07Eu <sup>2+</sup> |             |            |           |
|---------|------|------------------------------------------------------------------------------|-------------|------------|-----------|
| Atom    | Wyck | x                                                                            | y           | z          | Occupancy |
| Sr1     | 8d   | 0.40798(18)                                                                  | 0.0013(5)   | 0.3450(5)  | 0.947     |
| Eu1     | 8d   | 0.40798(18)                                                                  | 0.0013(5)   | 0.3450(5)  | 0.003     |
| K1      | 8d   | 0.40798(18)                                                                  | 0.0013(5)   | 0.3450(5)  | 0.05      |
| Sr2     | 8d   | 0.22822(18)                                                                  | 0.0201(4)   | 0.4927(4)  | 0.986     |
| Eu2     | 8d   | 0.22822(18)                                                                  | 0.0201(4)   | 0.4927(4)  | 0.014     |
| Sr3     | 4c   | 0.48734(30)                                                                  | -0.25       | 0.0166(8)  | 0.978     |
| Eu3     | 4c   | 0.48734(30)                                                                  | -0.25       | 0.0166(8)  | 0.022     |
| Sr4     | 4c   | 0.3372(4)                                                                    | 0.25        | 0.7171(8)  | 0.681     |
| Eu4     | 4c   | 0.3372(4)                                                                    | 0.25        | 0.7171(8)  | 0.019     |
| K2      | 4c   | 0.3372(4)                                                                    | 0.25        | 0.7171(8)  | 0.3       |
| K3      | 4c   | 0.3198(6)                                                                    | -0.25       | 0.7301(16) | 0.6       |
| Sr5     | 4c   | 0.3198(6)                                                                    | -0.25       | 0.7301(16) | 0.387     |
| Eu5     | 4c   | 0.3198(6)                                                                    | -0.25       | 0.7301(16) | 0.013     |
| Sc      | 4c   | 0.5054(5)                                                                    | -0.25       | 0.4944(14) | 1         |
| Si1     | 4c   | 0.3258(13)                                                                   | -0.25       | 0.2310(33) | 1         |
| Si2     | 4c   | 0.3708(7)                                                                    | 0.25        | 0.2483(20) | 1         |
| Si3     | 8d   | 0.4183(6)                                                                    | -0.0097(14) | 0.7766(12) | 1         |
| O1      | 4c   | 0.3738(16)                                                                   | -0.25       | -0.069(5)  | 1         |
| O2      | 8d   | 0.3071(10)                                                                   | -0.3364(20) | 0.3941(34) | 1         |
| O3      | 4c   | 0.3686(17)                                                                   | -0.25       | 0.248(5)   | 1         |
| O4      | 4c   | 0.3391(22)                                                                   | 0.25        | 0.091(5)   | 1         |
| O5      | 8d   | 0.2606(9)                                                                    | 0.3466(16)  | 0.2124(18) | 1         |
| O6      | 4c   | 0.4027(7)                                                                    | 0.25        | 0.3910(17) | 1         |
| O7      | 8d   | 0.4135(6)                                                                    | -0.0334(11) | 1.0194(15) | 1         |
| O8      | 8d   | 0.3485(7)                                                                    | 0.0311(14)  | 0.6803(19) | 1         |
| O9      | 8d   | 0.4745(10)                                                                   | 0.0750(19)  | 0.7202(25) | 1         |
| O10     | 8d   | 0.4505(11)                                                                   | -0.1202(23) | 0.6643(33) | 1         |

| <b>Formula</b>                                                               |             |             |             |             |                  |
|------------------------------------------------------------------------------|-------------|-------------|-------------|-------------|------------------|
| <b>KSr<sub>5.81</sub>Sc(SiO<sub>4</sub>)<sub>4</sub>:0.11Eu<sup>2+</sup></b> |             |             |             |             |                  |
| <b>Atom</b>                                                                  | <b>Wyck</b> | <b>x</b>    | <b>y</b>    | <b>z</b>    | <b>Occupancy</b> |
| Sr1                                                                          | 8d          | 0.40869(24) | -0.0001(5)  | 0.3317(9)   | 0.946            |
| Eu1                                                                          | 8d          | 0.40869(24) | -0.0001(5)  | 0.3317(9)   | 0.004            |
| K1                                                                           | 8d          | 0.40869(24) | -0.0001(5)  | 0.3317(9)   | 0.05             |
| Sr2                                                                          | 8d          | 0.22560(22) | 0.0226(4)   | 0.4930(6)   | 0.978            |
| Eu2                                                                          | 8d          | 0.22560(22) | 0.0226(4)   | 0.4930(6)   | 0.022            |
| Sr3                                                                          | 4c          | 0.4818(4)   | -0.25       | -0.0014(12) | 0.964            |
| Eu3                                                                          | 4c          | 0.4818(4)   | -0.25       | -0.0014(12) | 0.036            |
| Sr4                                                                          | 4c          | 0.3392(5)   | 0.25        | 0.7235(10)  | 0.67             |
| Eu4                                                                          | 4c          | 0.3392(5)   | 0.25        | 0.7235(10)  | 0.03             |
| K2                                                                           | 4c          | 0.3392(5)   | 0.25        | 0.7235(10)  | 0.3              |
| K3                                                                           | 4c          | 0.3213(5)   | -0.25       | 0.6633(14)  | 0.6              |
| Sr5                                                                          | 4c          | 0.3213(5)   | -0.25       | 0.6633(14)  | 0.382            |
| Eu5                                                                          | 4c          | 0.3213(5)   | -0.25       | 0.6633(14)  | 0.018            |
| Sc                                                                           | 4c          | 0.4963(7)   | -0.25       | 0.4761(19)  | 1                |
| Si1                                                                          | 4c          | 0.3292(10)  | -0.25       | 0.2295(28)  | 1                |
| Si2                                                                          | 4c          | 0.3598(12)  | 0.25        | 0.2206(30)  | 1                |
| Si3                                                                          | 8d          | 0.4198(8)   | 0.0029(17)  | 0.7721(18)  | 1                |
| O1                                                                           | 4c          | 0.3288(26)  | -0.25       | 0.046(6)    | 1                |
| O2                                                                           | 8d          | 0.2962(12)  | -0.3601(22) | 0.342(5)    | 1                |
| O3                                                                           | 4c          | 0.4055(22)  | -0.25       | 0.316(6)    | 1                |
| O4                                                                           | 4c          | 0.3934(20)  | 0.25        | 0.062(6)    | 1                |
| O5                                                                           | 8d          | 0.2887(13)  | 0.3475(21)  | 0.2634(33)  | 1                |
| O6                                                                           | 4c          | 0.3992(19)  | 0.25        | 0.373(5)    | 1                |
| O7                                                                           | 8d          | 0.4185(11)  | -0.0338(19) | 0.9983(35)  | 1                |
| O8                                                                           | 8d          | 0.3350(13)  | 0.0166(21)  | 0.680(4)    | 1                |
| O9                                                                           | 8d          | 0.4833(13)  | 0.1063(27)  | 0.718(4)    | 1                |
| O10                                                                          | 8d          | 0.4557(10)  | -0.1049(19) | 0.6408(33)  | 1                |

| Formula |      | KSr <sub>5.81</sub> Sc(SiO <sub>4</sub> ) <sub>4</sub> :0.13Eu <sup>2+</sup> |             |            |           |
|---------|------|------------------------------------------------------------------------------|-------------|------------|-----------|
| Atom    | Wyck | x                                                                            | y           | z          | Occupancy |
| Sr1     | 8d   | 0.41164(19)                                                                  | 0.0047(4)   | 0.3428(5)  | 0.946     |
| Eu1     | 8d   | 0.41164(19)                                                                  | 0.0047(4)   | 0.3428(5)  | 0.004     |
| K1      | 8d   | 0.41164(19)                                                                  | 0.0047(4)   | 0.3428(5)  | 0.05      |
| Sr2     | 8d   | 0.22142(18)                                                                  | 0.0114(4)   | 0.4934(5)  | 0.973     |
| Eu2     | 8d   | 0.22142(18)                                                                  | 0.0114(4)   | 0.4934(5)  | 0.027     |
| Sr3     | 4c   | 0.48664(31)                                                                  | -0.25       | 0.0118(9)  | 0.958     |
| Eu3     | 4c   | 0.48664(31)                                                                  | -0.25       | 0.0118(9)  | 0.042     |
| Sr4     | 4c   | 0.3376(5)                                                                    | 0.25        | 0.7257(8)  | 0.664     |
| Eu4     | 4c   | 0.3376(5)                                                                    | 0.25        | 0.7257(8)  | 0.036     |
| K2      | 4c   | 0.3376(5)                                                                    | 0.25        | 0.7257(8)  | 0.3       |
| K3      | 4c   | 0.3168(4)                                                                    | -0.25       | 0.6724(11) | 0.6       |
| Sr5     | 4c   | 0.3168(4)                                                                    | -0.25       | 0.6724(11) | 0.379     |
| Eu5     | 4c   | 0.3168(4)                                                                    | -0.25       | 0.6724(11) | 0.021     |
| Sc      | 4c   | 0.5004(11)                                                                   | -0.25       | 0.4862(26) | 1         |
| Si1     | 4c   | 0.3327(11)                                                                   | -0.25       | 0.2461(22) | 1         |
| Si2     | 4c   | 0.3569(11)                                                                   | 0.25        | 0.2495(29) | 1         |
| Si3     | 8d   | 0.4300(4)                                                                    | 0.0012(8)   | 0.7822(9)  | 1         |
| O1      | 4c   | 0.3487(21)                                                                   | -0.25       | -0.085(5)  | 1         |
| O2      | 8d   | 0.3078(9)                                                                    | -0.3432(15) | 0.3189(23) | 1         |
| O3      | 4c   | 0.4017(15)                                                                   | -0.25       | 0.3860(35) | 1         |
| O4      | 4c   | 0.3842(21)                                                                   | 0.25        | 0.178(6)   | 1         |
| O5      | 8d   | 0.2535(7)                                                                    | 0.3387(10)  | 0.1760(19) | 1         |
| O6      | 4c   | 0.4073(15)                                                                   | 0.25        | 0.3903(34) | 1         |
| O7      | 8d   | 0.4266(6)                                                                    | -0.0354(9)  | 1.0177(17) | 1         |
| O8      | 8d   | 0.3462(7)                                                                    | 0.0281(10)  | 0.6937(14) | 1         |
| O9      | 8d   | 0.4488(9)                                                                    | 0.1193(15)  | 0.7538(22) | 1         |
| O10     | 8d   | 0.4540(9)                                                                    | -0.1008(12) | 0.6334(22) | 1         |

**Table S2.** The bond lengths of Sr-O in detail.

|                 |             |                 |             |
|-----------------|-------------|-----------------|-------------|
| Sr1-O2          | 2.737(23)   | Sr3-O9          | 2.834(21)   |
| Sr1-O3          | 2.878(25)   | Sr3-O9          | 2.834(21)   |
| Sr1-O5          | 2.633(22)   | Sr3-O10         | 2.786(21)   |
| Sr1-O6          | 2.781(5)    | Sr3-O10         | 2.786(21)   |
| Sr1-O7          | 2.463(19)   | <b>Sr3 Mean</b> | <b>2.75</b> |
| Sr1-O8          | 2.759(15)   | Sr4-O2          | 2.856(25)   |
| Sr1-O9          | 3.043(20)   | Sr4-O2          | 2.856(25)   |
| Sr1-O9          | 2.690(20)   | Sr4-O4          | 2.324(29)   |
| Sr1-O10         | 2.938(21)   | Sr4-O6          | 2.701(25)   |
| Sr1-O10         | 2.732(21)   | Sr4-O8          | 2.840(27)   |
| Sr1-O2          | 2.737(23)   | Sr4-O8          | 2.840(27)   |
| <b>Sr1 Mean</b> | <b>2.77</b> | Sr4-O9          | 2.843(21)   |
| Sr2-O1          | 2.786(11)   | Sr4-O9          | 2.843(21)   |
| Sr2-O2          | 2.953(26)   | <b>Sr4 Mean</b> | <b>2.76</b> |
| Sr2-O2          | 2.354(23)   | Sr5-O1          | 2.523(30)   |
| Sr2-O5          | 2.650(19)   | Sr5-O2          | 2.737(26)   |
| Sr2-O5          | 2.505(18)   | Sr5-O2          | 2.737(26)   |
| Sr2-O7          | 2.786(16)   | Sr5-O3          | 3.25(5)     |
| Sr2-O8          | 2.723(15)   | Sr5-O5          | 2.625(23)   |
| Sr2-O8          | 2.380(15)   | Sr5-O5          | 2.625(23)   |
| <b>Sr2 Mean</b> | <b>2.64</b> | Sr5-O8          | 2.814(27)   |
| Sr3-O1          | 2.997(28)   | Sr5-O8          | 2.814(27)   |
| Sr3-O3          | 2.72(5)     | Sr5-O10         | 3.178(22)   |
| Sr3-O4          | 2.525(25)   | Sr5-O10         | 3.178(22)   |
| Sr3-O7          | 2.656(17)   | Sr5-O1          | 2.523(30)   |
| Sr3-O7          | 2.656(17)   | <b>Sr5 Mean</b> | <b>2.85</b> |

### Temperature uncertainty $\delta T$ :

Temperature uncertainty  $\delta T$  determines the temperature measurement accuracy or how small temperature difference sensor can measure. The temperature uncertainty of the nanothermometers  $\delta T$  is defined as:<sup>1-3</sup>

$$\delta T = \frac{1}{S_r} \frac{\delta \Delta}{\Delta} \quad (S1)$$

where  $\delta \Delta$  is the uncertainty in the determination of  $\Delta$  estimated through the errors in I.

### Figures:

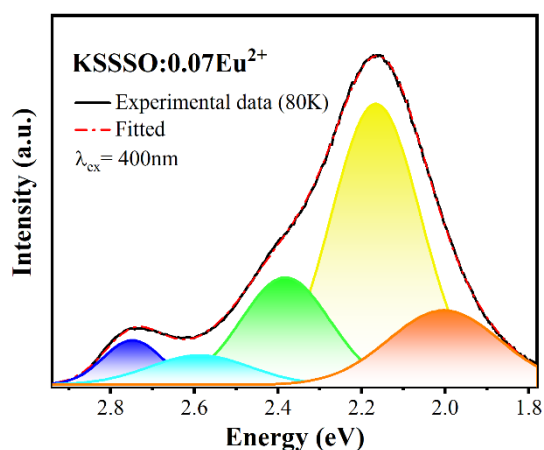

Fig. S1 Gaussian fitting of the PL spectra of KSSSO:0.07Eu<sup>2+</sup> excited by 400 nm at 80 K.

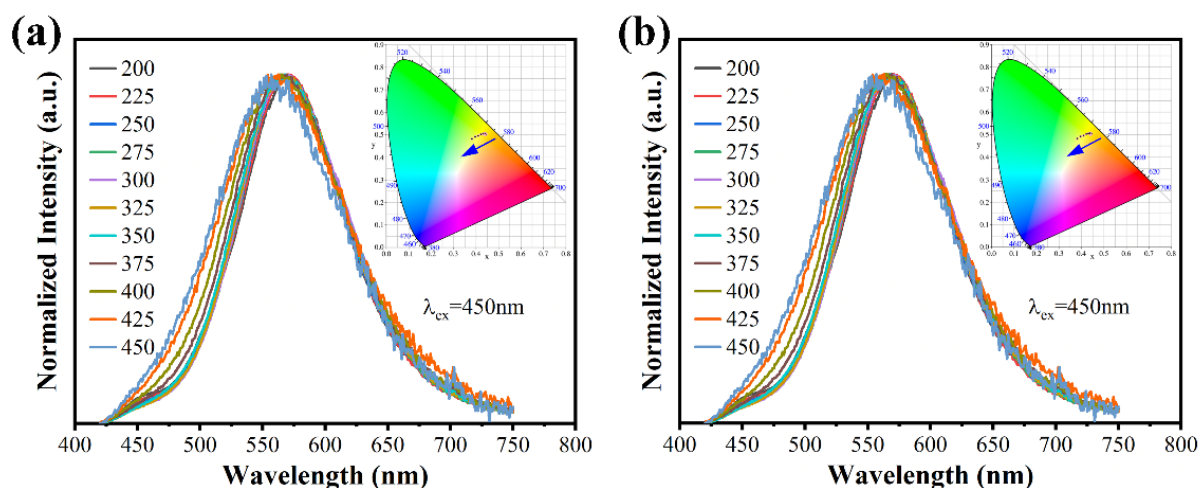

Fig. S2 The normalized TPL spectra excited by 450 (a) and 400 nm (b) and the insets are the CIE chromaticity diagram.

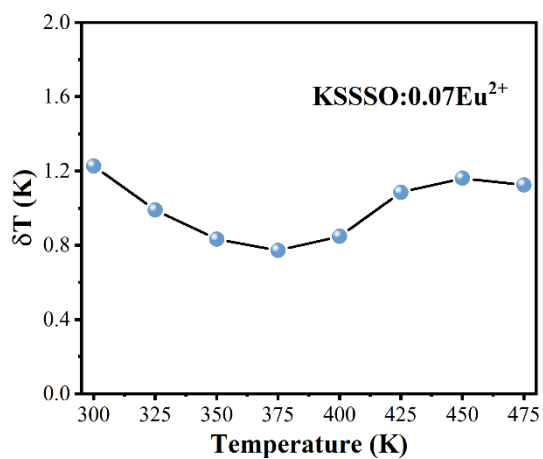

**Fig. S3** Temperature uncertainty calculated using Eq. S1.

**Reference:**

1. T. P. van Swieten, A. Meijerink and F. T. Rabouw, *ACS Photonics*, 2022, **9**, 1366-1374.
2. S. Balabhadra, M. L. Debasu, C. D. S. Brites, R. A. S. Ferreira and L. D. Carlos, *The Journal of Physical Chemistry C*, 2017, **121**, 13962-13968.
3. K. Panigrahi and K. K. Chattopadhyay, *Journal of Luminescence*, 2022, **247**, 118883.
